# Supplementary material
Source: Springer Nature journal article supplement (https://www.springermedizin.de/resource/supplementary/12885_2010_2898_MOESM1_ESM.pdf/9462260)

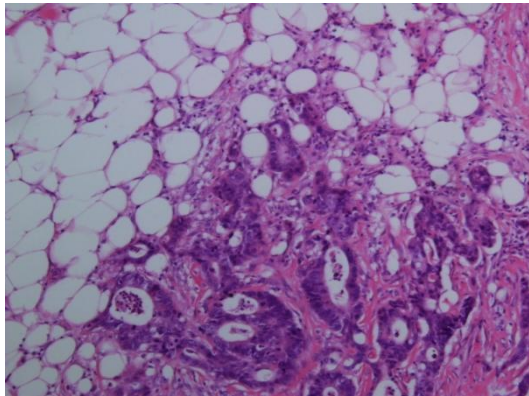

A  $\times 100$

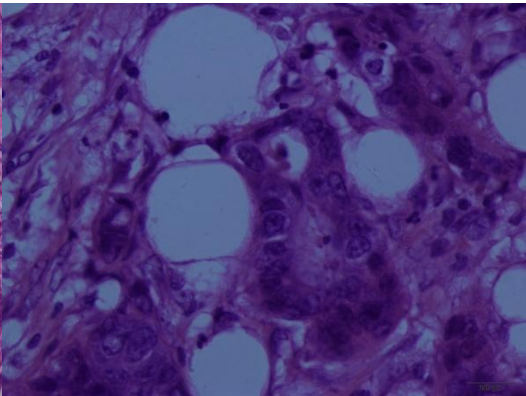

B  $\times 400$

Supplement: MOESM1 [file 9462260]
